# Early life stress alters transcriptomic patterning across reward circuitry in male and female mice

Catherine Jensen Peña<sup>1,2,\*</sup>, Milo Smith<sup>1,3</sup>, Aarthi Ramakrishnan<sup>1</sup>, Hannah M. Cates<sup>1</sup>, Rosemary C. Bagot<sup>1,4</sup>, Hope G. Kronman<sup>1</sup>, Bhakti Patel<sup>1</sup>, Immanuel Purushothaman<sup>1</sup>, Joel T. Dudley<sup>1,3</sup>, Hirofumi Morishita<sup>1</sup>, Li Shen<sup>1</sup>, Eric J. Nestler<sup>1,\*</sup>

**ABSTRACT:** Abuse, neglect, and other forms of early life stress (ELS) significantly increase risk for psychiatric disorders including depression. In this study, we show that ELS in a postnatal sensitive period increases sensitivity to adult stress in female mice, consistent with our earlier findings in male mice. We used RNA-sequencing in the ventral tegmental area, nucleus accumbens, and prefrontal cortex of male and female mice to show for the first time that adult stress is distinctly represented in the brain's transcriptome depending on ELS history. We identify: 1) biological pathways disrupted after ELS and associated with increased behavioral stress sensitivity, 2) putative transcriptional regulators of the effect of ELS on adult stress response, and 3) subsets of primed genes specifically associated with latent depression-like behavior. We also provide the first transcriptomic evidence that ELS increases sensitivity to future stress by enhancing known programs of cortical plasticity.

\*Correspondence to: CJP ([cpena@princeton.edu](mailto:cpena@princeton.edu)) or EJN ([eric.nestler@mssm.edu](mailto:eric.nestler@mssm.edu))

## INTRODUCTION:

Early life stress (ELS) increases the lifetime risk of depression by two- to four-fold, and is one of the strongest risk factors for developing mental illness<sup>1,2</sup>. Nearly 1% of children in the US are victims of child abuse and neglect each year<sup>3</sup>, and many more children experience other forms of profound stress and trauma, including death of a caregiver, parental incarceration, or experience of a natural disaster. Studies in humans and animal models indicate that ELS increases risk for depression by sensitizing individuals to stress later in life, leading to a first appearance or synergistic worsening of depression-like symptoms<sup>4-9</sup>. Stress early in life can alter developmental brain trajectories, and not just steady-state processes, which has the potential to augment the long-term impact of stress. However, the ways in which ELS alters transcriptional development in the brain to increase risk for depression and depression-like behaviors are poorly understood.

We recently reported that ELS during a sensitive period from postnatal day P10-20, but not

P2-12, increases the susceptibility to develop depression-related behavioral abnormalities after a second hit of stress in adulthood in male mice<sup>7,8</sup>. Here, we first demonstrate that ELS in the same postnatal period likewise increases the susceptibility of female mice to adult stress. Using RNA-sequencing, we next asked whether ELS in male and female mice alters patterns of gene transcription in the brain's reward circuitry, including ventral tegmental area (VTA), nucleus accumbens (NAc), and prefrontal cortex (PFC), all of which are implicated in stress responses and human depression. Our previous work found broad and long-lasting transcriptional changes in adult male VTA after ELS<sup>7</sup>. We hypothesized that similar biological pathways might be disrupted in male and female mice by ELS, even if specific genes within each pathway are distinct between the sexes. We also hypothesized that ELS-induced transcriptional changes in these brain regions would in turn lead to either unique transcriptional responses to additional stress in adulthood, or an exaggeration of earlier transcriptional alterations. We used a variety of analytical tools to

<sup>1</sup> Nash Family Department of Neuroscience and Friedman Brain Institute, Icahn School of Medicine at Mount Sinai, New York, NY 10029, USA

<sup>2</sup> Present address: Princeton Neuroscience Institute, Princeton University, Princeton, NJ 08544, USA

<sup>3</sup> Institute for Next Generation Healthcare, Icahn School of Medicine at Mount Sinai, New York, NY 10029, USA

<sup>4</sup> Present address: Department of Psychology, McGill University, Montréal, Québec, H3A 1B1, Canada

determine biological processes, “primed” genes, and putative regulatory factors disrupted by ELS alone or in combination with adult stress to address these questions.

This is the first genome-wide analysis of transcriptional changes in both male and female mice, across three brain reward regions, after ELS with or without subsequent adult stress. These transcriptional analyses provide a foundation for future research testing the causal role of molecular pathways implicated in ELS-induced stress sensitivity in both sexes.

## RESULTS:

### ***ELS increases susceptibility to adult stress in female mice.***

We measured depression-like behaviors in female mice on four individual tests and in a composite “depression score” (Methods). Adult sub-threshold variable stress (STVS) alone did not significantly alter behavior relative to standard-reared control female mice on any measure, as reported previously<sup>14</sup>. There was an interaction between ELS and STVS on latency to eat (**Figure 1b**) and on the ratio of latency to eat in a novel vs home cage environment (**Figure 1c**) in the novelty-suppressed feeding test<sup>10</sup>. There were also main effects of both ELS and STVS on the ratio of novel/home cage latencies. Female mice that experienced two hits of stress had increased latency and ratios relative to ELS and STVS alone. Survival analysis indicated differences in latency to eat among ELS-STVS mice compared to ELS mice (**Figure 1d**, Log-rank Mantel-Cox:  $\chi^2=4.986$ ,  $p=0.0256$ ) and STVS mice (Log-rank Mantel-Cox:  $\chi^2=5.252$ ,  $p=0.0219$ ). Main effects of both ELS and STVS on distance traveled (**Figure 1e**) in the NSF may differences in non-ambulatory time spent eating rather than hyperactivity *per se*.

In the forced-swim test<sup>11</sup> there was a main effect of STVS on latency to immobility, and female mice that experienced both ELS and STVS had shorter latency to immobility compared to ELS alone (**Figure 1f**). There were no differences in total immobility (**Figure 1g**). The two-bottle choice sucrose preference test<sup>12</sup> revealed no effect of either stress alone or in combination in female mice (**Figure 1h**). Grooming duration after being sprayed with a 10% sucrose

solution<sup>13</sup> showed a main effect of ELS, but no interaction with STVS, such that ELS decreased grooming duration (**Figure 1i**).

We generated a composite depression score of these behavioral responses and found a main effect of ELS (**Figure 1j**). The combination of ELS and adult stress in female mice significantly increased this composite score relative to STVS alone, similar to our earlier findings in male mice on a different battery of behavioral tests before and after repeated social defeat stress (**Figure 1l**)<sup>7</sup>. There was also an interaction of stress types on body weight in adulthood in female mice, such that ELS increased weight among control mice but decreased weight after STVS (**Figure 1k**).

We next sought to replicate the novelty-suppressed feeding, grooming, and sucrose preference findings in an independent cohort of female mice, and simultaneously test whether stress earlier in the postnatal period (P2-10, termed early-ELS) also heightens later stress sensitivity. We did not find an effect of early-ELS on any individual measure (**Figure S1a-c**). We then analyzed the replication cohort including only late ELS groups, as in the original cohort. There was a main effect of ELS and STVS on the NSF ratio of latencies to eat in the novel arena vs home cage (**Figure S1a**). Cohort was not a significant factor for NSF ratio when cohorts were combined ( $p=0.723$ ), and significance of interaction of ELS and STVS ( $F_{1,81}=5.326$ ,  $p=0.024$ ), main effect of ELS ( $F_{1,81}=11.225$ ,  $p=0.001$ ) and main effect of STVS ( $F_{1,81}=10.376$ ,  $p=0.002$ ) were maintained. Within the replication cohort there was no main effect of either stress on splash test grooming duration (**Figure S1b**). Cohort was not a significant factor for splash test grooming duration when cohorts were combined ( $p=0.800$ ), but there were trends for main effects of ELS ( $F_{1,78}=3.746$ ,  $p=0.057$ ) and STVS ( $F_{1,78}=2.906$ ,  $p=0.092$ ). We again found a lack of effect of ELS or STVS on sucrose preference in females in the replication cohort (**Figure S1c**). Interestingly, when cohorts were combined there was no effect of cohort ( $p=0.778$ ) but there was a trend for an interaction between ELS and STVS on sucrose preference ( $F_{1,81}=2.928$ ,  $p=0.091$ ), in contrast to our findings in the first cohort alone.

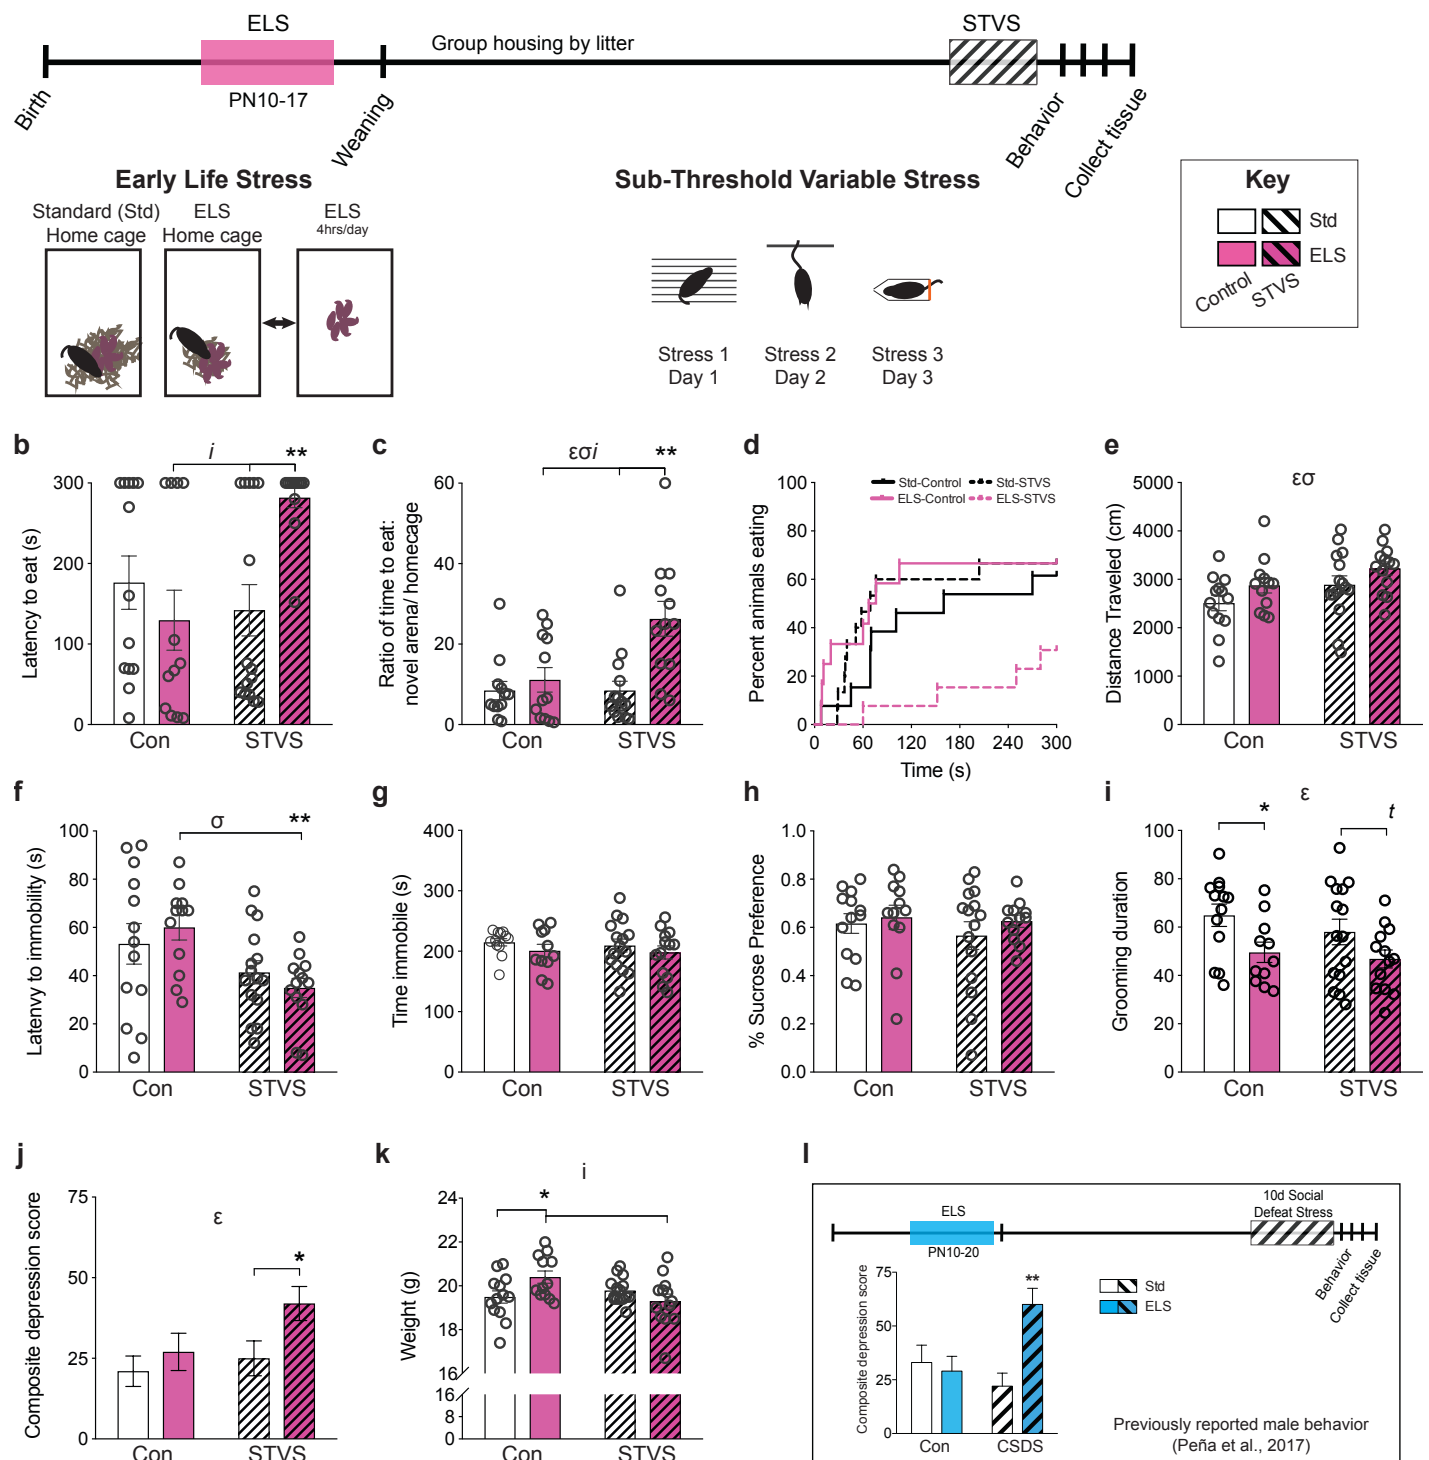

**Adult stress induces distinct transcriptional patterns depending on history of ELS.** In order to investigate the transcriptional correlates of ELS and adult stress, alone or in combination, we performed poly-A selected RNAseq from whole-tissue punches of adult male and female VTA, NAc, and PFC. Female brain samples were taken from mice behaviorally characterized in the initial cohort here (**Figure 1**), while male brain samples were from mice whose behavior was reported previously<sup>7</sup>. An analysis of differentially expressed genes (DEGs) was previously reported for male VTA only after either ELS or social defeat alone<sup>7</sup>. Here we extend this analysis and include transcriptional changes after ELS, adult stress (STVS or Defeat), and a combination of the two stresses (ELS+STVS/Defeat), in three brain reward regions from adult males and females. Significance of DEGs was set at uncorrected  $p < 0.05$  and  $\log_2(\text{fold-change}) > |0.3785|$  (LFC, corresponding to fold-change  $> 30\%$ ) for broad pattern identification. There was 1-23% overlap in DEGs across the three stress conditions (ELS or STVS/Defeat or ELS+STVS/Defeat) in male and female VTA, male NAc, and male and female PFC (**Figure 2a, f, i, q, v**), and more than 50% overlap in female NAc, compared to a standard-reared control with no adult stress (Std-Ctl; **Figure 2n**).

Union heatmaps sorted by LFC of ELS DEGs showed similarities in direction of expression change across stress conditions compared to Std-Ctl (**Figure 2b, e, j, m, r, u**, top). Clustering revealed greater transcriptional similarities between two hits of stress and ELS alone in female NAc and male and female PFC (**Figure 2 m, r, u**, bottom, respectively), greater similarities between two hits of stress and adult stress alone in male and female VTA (**Figure 2b, e**, bottom), and greater similarity between ELS and adult stress alone in male NAc (**Figure 2j**, bottom).

We complemented these analyses with a two-sided rank-rank hypergeometric overlap analysis (RRHO<sup>14</sup>) to identify patterns and strength of genome-wide overlap in a threshold-free manner which confirmed co-regulation of genes by ELS and adult stresses (**Figure 2d, g, l, o, w**, left) in all brain regions except male PFC, which showed only weak co-regulation (**Figure 2t**, left). As previously reported for male VTA<sup>7</sup>, these analyses suggest that late postnatal stress transcriptionally primes VTA to be in a

“depression-like” state. However, RRHO analysis revealed that adult stress after ELS induces a transcriptionally unique signature compared to adult stress after standard rearing conditions (**Figure 2d, g, l, o, t, w**, right), with a significant opposite-regulation of gene expression in female NAc (**Figure 2o**, right). These unique latent signatures revealed by adult stress suggest transcriptional priming.

We next asked whether ELS, adult stress, or a combination of stresses induced cell type-specific transcriptional changes. Enrichment analysis using brain region-specific curated cell type-specific marker lists<sup>15</sup> revealed little cell type specificity, indicating instead that DEGs were expressed by multiple cell types within each brain region **Figure 2c, h, k, p, s, x**.

**ELS induces transcriptional alterations via distinct regulatory pathways in males and females.** We used three complementary analyses to assess how ELS affects long-term molecular regulation within the brain’s reward circuitry compared to standard-reared controls: 1) DAVID functional annotation for gene ontology of biological processes, 2) upstream regulator analysis with Ingenuity Pathway Analysis, and 3) HOMER Motif Analysis to predict differential transcriptional regulators. These analyses were agnostic to direction of expression change. We hypothesized that, while distinct sets of genes may be regulated across sexes or across brain regions, similar biological processes or transcriptional regulators might be affected. Top gene ontology terms for male and female VTA, NAc, and PFC are shown in **Fig 3a, d, and g**. Cell differentiation was the only biological process with altered enrichment in both males and females within one brain region, NAc (**Figure 3d**).

Multicellular organism development and nervous system development also had altered enrichment across brain regions and sexes, together suggesting that ELS in this sensitive window causes long-lasting alterations in development of this reward circuitry. Top predicted upstream regulators of transcriptional alterations were distinct between males and females, but alpha-synuclein (SNCA) and beta catenin (CTNFB1) were both predicted upstream regulators in female VTA and NAc (**Fig 3b, e, h**). Analysis of enriched transcription factor binding sites did not reveal commonality across brain regions or sexes. Of

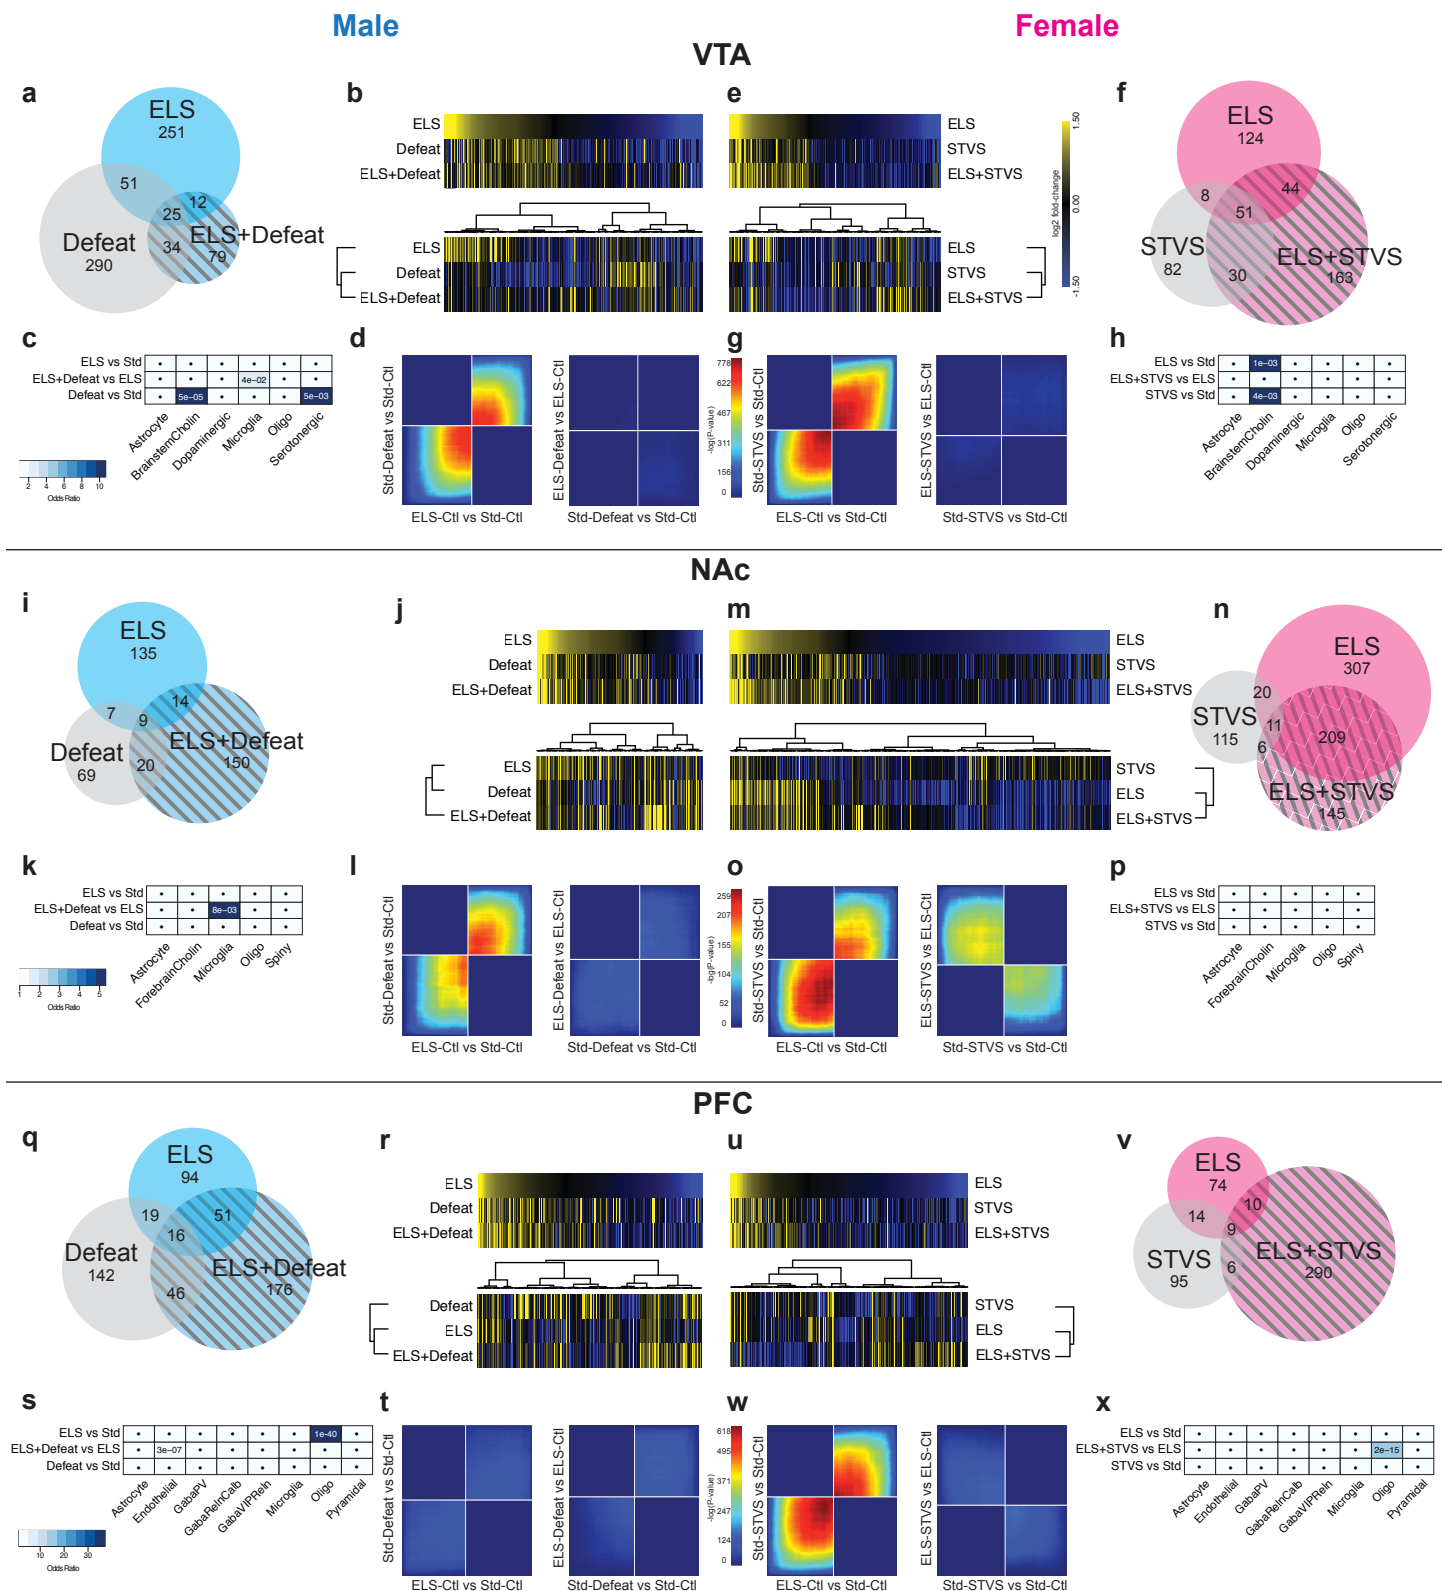

**Figure 2 | ELS alters broad transcriptional patterns within male and female brain reward regions.** DEGs (uncorrected  $p < 0.05$ ) in adult male VTA (a-d), adult female VTA (e-h), adult male NAc (i-l), adult female NAc (m-p), adult male PFC (q-t), and adult female PFC (u-x). All DEGs for Venn diagrams and heatmaps are relative to standard-control of the matched sex/region. Venn diagrams of DEGs (a, f, i, n, q, v) altered by ELS, adult stress (Defeat or STVS), or a combination of stresses within each sex and brain region. Union heatmaps of DEGs (b, e, j, m, r, u, top) represent LFC of genes in matched comparisons regardless of significance. Clustering of these heatmaps (b, e, j, m, r, u, bottom) reveal differences between stress comparisons. Enrichment of DEGs in each comparison with cell-type specific genes found in midbrain (c, h), striatum (k, p), or PFC (s, x). Significance of enrichment is indicated in each cell and shaded by degree of odds ratio, by region. d, g, l, o, t, w, Threshold-free comparison of DEGs by rank-rank hypergeometric overlap. Pixels represent the overlap between the transcriptome of each comparison as noted, with the significance of overlap ( $-\log_{10}(p\text{-value})$  of a hypergeometric test) color coded. Lower left quadrant include co-upregulated genes, upper right quadrant include co-downregulated genes, and upper left and lower right quadrants include oppositely regulated genes (up-down, and down-up, respectively). Genes along each axis are sorted from most to least significantly regulated from the middle to outer corners.

interest was the finding that OTX2, which we showed previously is an important upstream regulator of ELS-induced transcription in the male VTA<sup>7</sup>, did not show this predicted role in the female VTA or in NAc or PFC in either sex.

We next examined molecular pathways altered by a second hit of stress after ELS, compared to ELS alone. Multicellular organism development was again a top GO term in male VTA and male and female PFC (Figure 4a and g). Interestingly, the effect of a second hit of stress after ELS was predicted to be regulated by common steroid hormones and their receptors in males and females, such that testosterone was a predicted upstream regulator in male and female VTA, ESR1 (estrogen receptor alpha) in male and female NAc, and beta-estradiol in male and female VTA (Figure 4b, e, h). While there were no common enriched transcription factor binding sites in DEG lists between males and females, a majority of the enriched factors

after a second hit of stress (Figure 4c, f, i) were the same as those enriched after ELS alone (Figure 3c, f, i), suggesting either continued or common regulation of these factors through adult stress.

**ELS primes a subset of genes for latent response to adult stress.** We defined “primed” genes as those in the ELS+adult stress group significantly ( $p < 0.05$ ) different from standard-control expression levels with  $LFC > |0.3875|$ , and also significantly ( $p < 0.05$ ) different from both ELS-alone and adult stress-alone groups, in either direction without fold-change cutoff (Figure 5a). Primed genes were unique by brain region (Figure 5b). Males and females shared no primed genes in VTA, 10 primed genes in NAc (*Abca4*, *Cldn2*, *Col8a1*, *Kcnj13*, *Krt18*, *Slc4a5*, *Steap1*, *Wdr72*, *Wfdc2*, 1500015O10Rik; all positively regulated), and 1 primed gene in PFC (*Twist1*, in opposite directions; Figure 5l, n). Primed genes were

## VTA

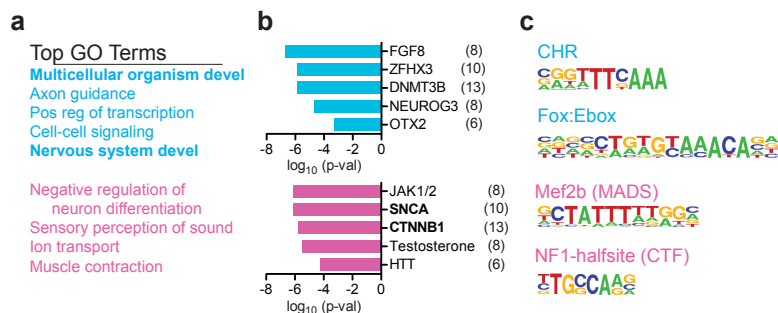

## NAc

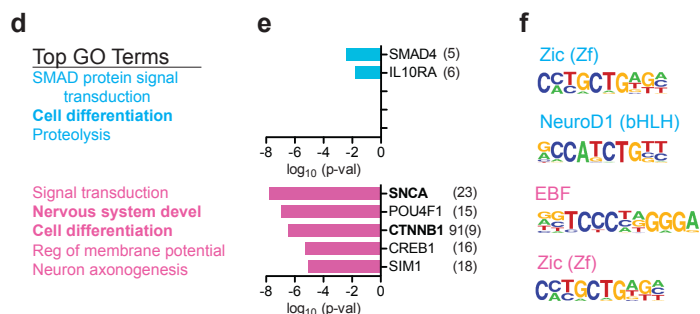

## PFC

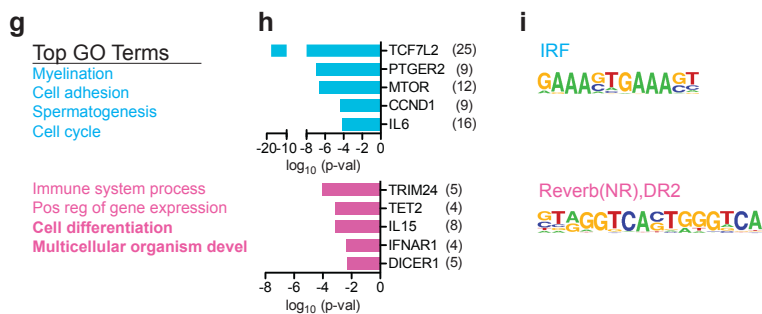

largely not altered by ELS or adult stress alone, as indicated by minimal expression changes in the corresponding columns of each heatmap (Figure 5c, e, g, i, k, m). Likewise, fold-change comparison between ELS+adult stress vs Std-Ctl and vs ELS-Ctl shows a majority of primed genes along the identity line, indicating that ELS alone did not alter primed genes (Figure 5d, f, h, j, l, n). Magnitude of change was independent of base mean read count and significance of change (Figure 5d, f, h, j, l, n). Some primed genes are annotated in Figure 5c-h, and a full table of primed genes is included (Supplemental Table 3). The greatest number of primed genes were found in PFC for both male and female mice (Figure 5g-h).

**Figure 3 | Predicted biological processes and transcriptional regulators altered by ELS.** Top gene ontology (GO) terms enriched in ELS-control vs. standard-control DEGs from male (top, blue) and female (bottom, pink) VTA (a), NAc (d) or PCF (g). b, Top predicted upstream regulators of ELS-control vs. standard-control DEGs from male (top, blue) and female (bottom, pink) VTA (b), NAc (e) or PCF (h). c, Top predicted transcription factors and binding sequences in promotor regions of ELS-control vs. standard-control DEGs from male (top, blue) and female (bottom, pink) VTA (c), NAc (f) or PCF (i). Bold terms are common across brain regions.

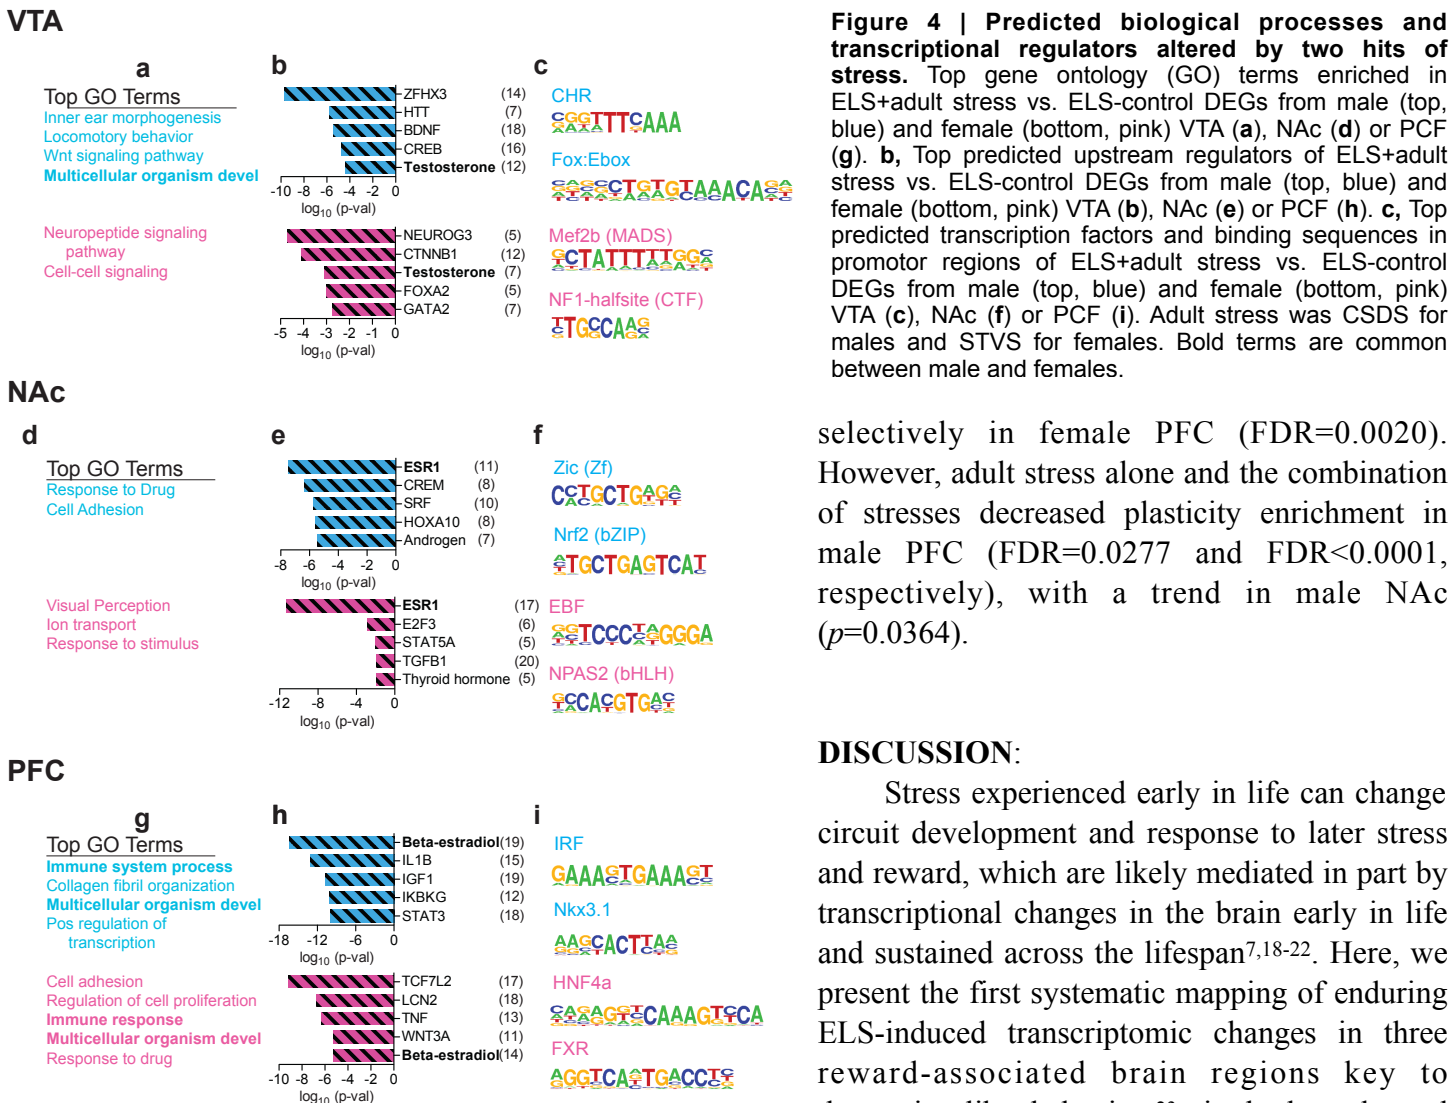

### Early life stress enriches for plasticity signatures.

We hypothesized that ELS might increase sensitivity to adult stress through increases in developmentally-defined plasticity programs. Plasticity signatures were previously computed by comparing transcription in primary visual cortex of wildtype and *Lynx1* knockout mice; these mice harbor a genetic mutation that preserves cortical plasticity beyond the juvenile critical period<sup>16,17</sup>. We calculated a normalized enrichment score to compare stress and plasticity signatures in a threshold-free manner from the full DEG lists. Consistent with our hypothesis, transcriptional signatures of plasticity were significantly and positively enriched after ELS in male NAc (FDR=0.0384, **Figure 6b**), with trends in male VTA ( $p=0.0846$ , **Figure 6a**) and female PFC ( $p=0.0563$ , **Figure 6c**). The combination of early life and adult stress positively enriched plasticity scores

**Figure 4 | Predicted biological processes and transcriptional regulators altered by two hits of stress.** Top gene ontology (GO) terms enriched in ELS+adult stress vs. ELS-control DEGs from male (top, blue) and female (bottom, pink) VTA (**a**), NAc (**d**) or PCF (**g**). **b**, Top predicted upstream regulators of ELS+adult stress vs. ELS-control DEGs from male (top, blue) and female (bottom, pink) VTA (**b**), NAc (**e**) or PCF (**h**). **c**, Top predicted transcription factors and binding sequences in promotor regions of ELS+adult stress vs. ELS-control DEGs from male (top, blue) and female (bottom, pink) VTA (**c**), NAc (**f**) or PCF (**i**). Adult stress was CSDS for males and STVS for females. Bold terms are common between male and females.

selectively in female PFC (FDR=0.0020). However, adult stress alone and the combination of stresses decreased plasticity enrichment in male PFC (FDR=0.0277 and FDR<0.0001, respectively), with a trend in male NAc ( $p=0.0364$ ).

### DISCUSSION:

Stress experienced early in life can change circuit development and response to later stress and reward, which are likely mediated in part by transcriptional changes in the brain early in life and sustained across the lifespan<sup>7,18-22</sup>. Here, we present the first systematic mapping of enduring ELS-induced transcriptomic changes in three reward-associated brain regions key to depression-like behaviors<sup>23</sup>, in both male and female mice, and we further assess transcriptomic responses to a second stress in adulthood.

This work extends to female mice our earlier findings in male mice that ELS from P10-17 (or P10-20) induces susceptibility to subsequent adult stress. The mouse ELS paradigm used here was based on both rodent maternal separation studies and work demonstrating reduced nesting and/or bedding material induces disordered maternal care among rodent dams<sup>24,25</sup>. We previously found that this same ELS procedure from P2-12 did not significantly alter depression-like behaviors in male mice, either before or after a second stress in adulthood, which may be due to immature stress-response circuitry or timing of molecular cascades that mediate adaptations to stressful stimuli<sup>7,8,26</sup>. In male mice, shifting the timing of ELS to P10-17 (or P10-20) also did not alter depression-like behaviors at baseline, but instead increased the risk that a second stress in adulthood

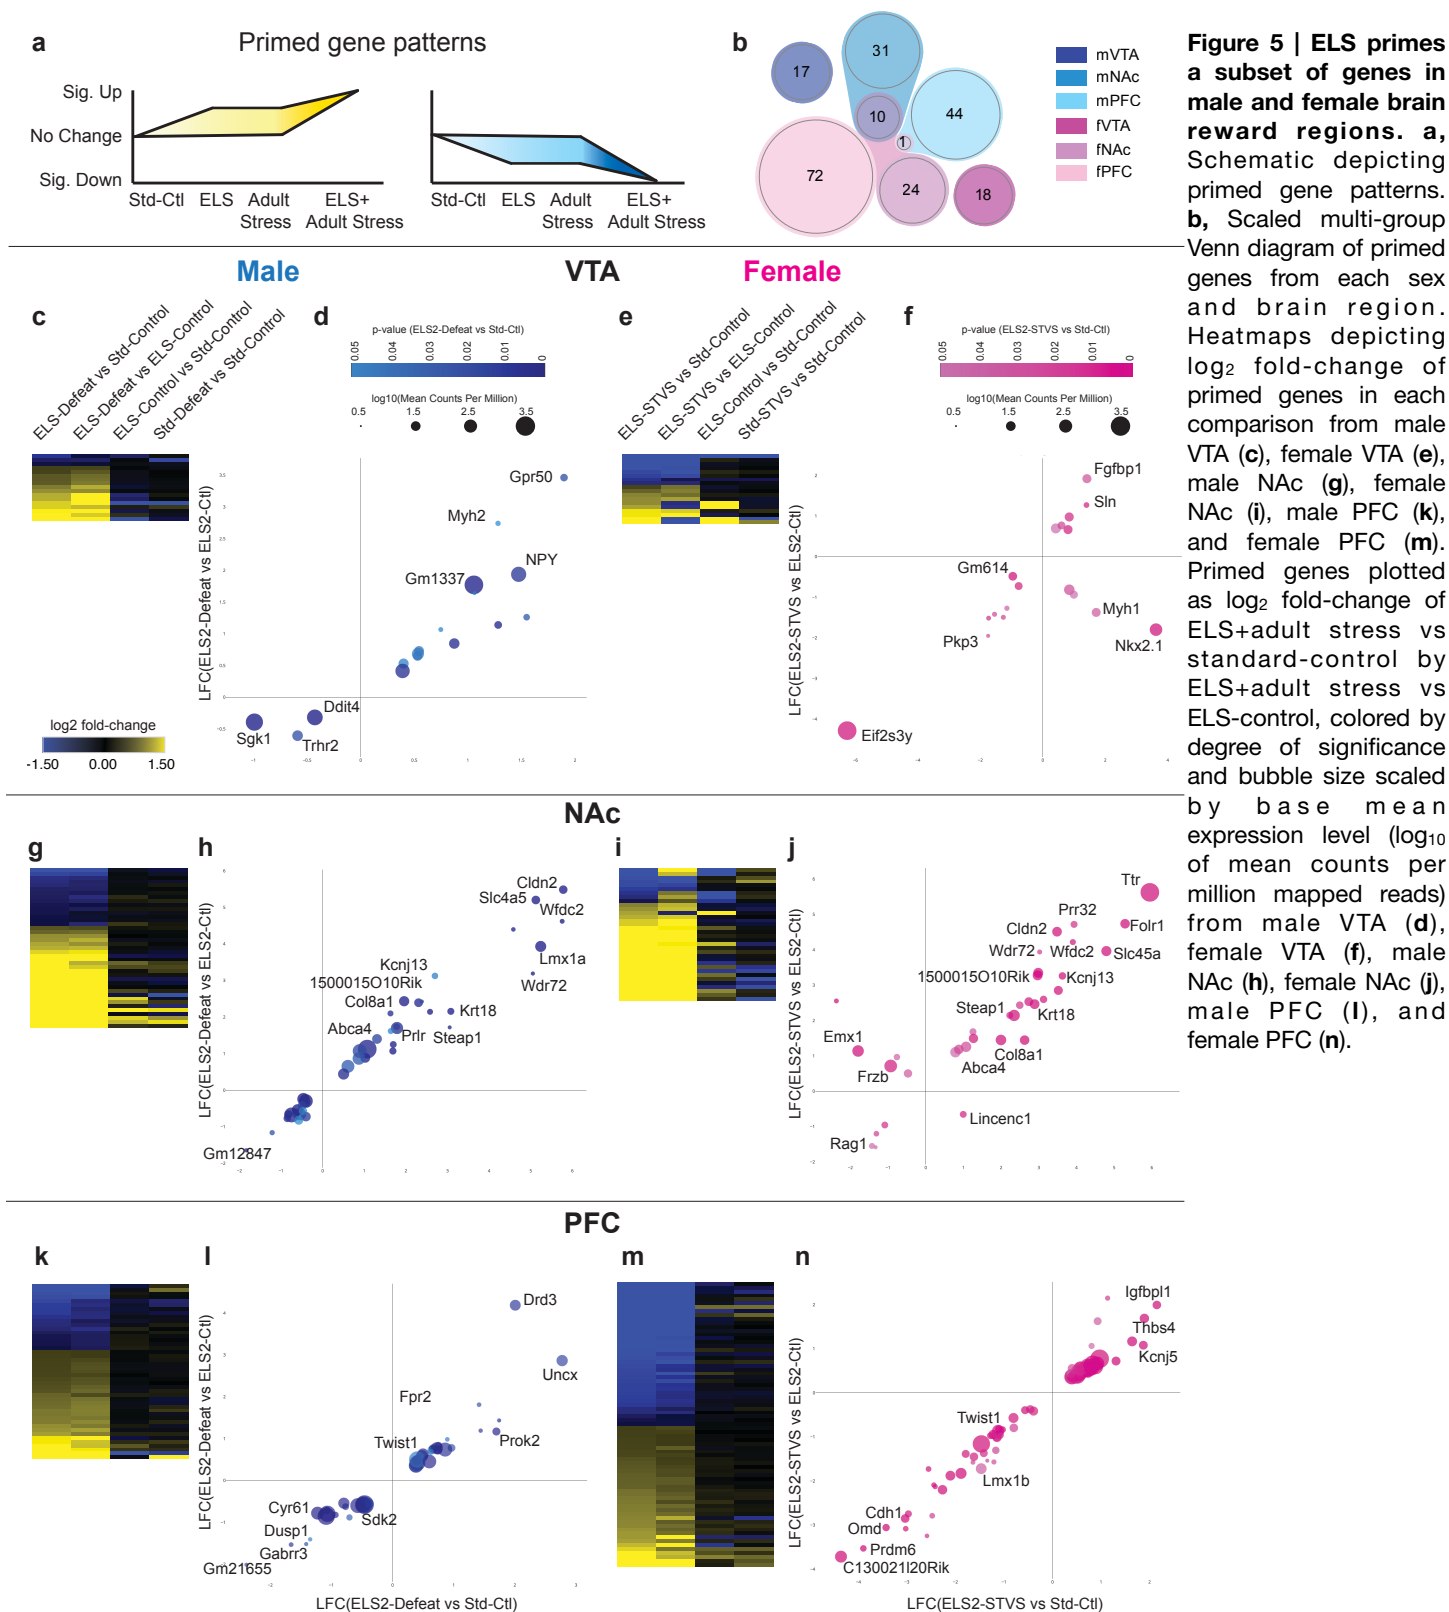

would result in depression-like behaviors. These findings are in contrast to other rodent ELS paradigms that report baseline anxiety-like behaviors from early (<P14) postnatal stress<sup>27</sup>, and evidence that ELS prior to P9 may in fact blunt hippocampal plasticity and dampen responses to additional stress<sup>28,29</sup>. Studies of humans that experienced early life adversity have

found earlier development of anxiety, depression, and other psychiatric illnesses, as well as latent vulnerability to these diseases<sup>30-32</sup>. For example, women abused as children are more likely to experience depression after additional adult abuse compared to women abused only as adults or only as children<sup>4</sup>. Key stress-responsive brain regions may



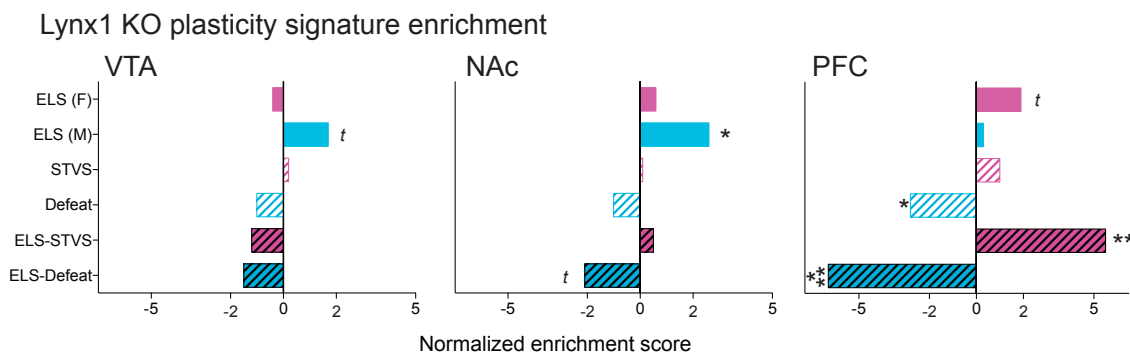

**Figure 6 | Enrichment of cortical plasticity signatures after stress.** Normalized Lynx1 KO plasticity signature enrichment score of indicated DEG lists from (a) VTA, (b) NAc, and (c) PFC. Each DEG comparison is to standard-control of the same sex and region. Significance of enrichment indicated by \*\*\*  $FDR < 0.001$ , \*\*  $FDR < 0.01$ , \*  $FDR < 0.05$ ,  $t p < 0.1$ .

mature faster in females than males<sup>33</sup>, and ELS may alter stress-related behaviors earlier in females than males<sup>34</sup>. Thus, we tested the hypothesis that stress in the earlier rather than later postnatal period might have greater impact on depression-like behavior in female mice. However, the greatest differences in individual and composite depression-like behavioral measures were found after the combination of ELS from P10-17 with STVS (**Figure S1a-c**), consistent with our findings in male mice. Our current and previous findings of a late postnatal (>P10) stress sensitive period among both male and female mice are also consistent with a lack of sex differences in the early postnatal period (<P9) of attachment sensitivity – coincident with a stress hyporesponsive period – which enables animals to attach to a caregiver to meet basic needs (feeding, thermoregulation, etc.) when animals are most vulnerable, regardless of stress associated with the caregiver<sup>26</sup>.

The later postnatal ELS that we find increases vulnerability to adult stress may be due to a later development of threat circuitry (see <sup>26</sup>) and later sensitive period of catecholamine circuitry development<sup>35</sup>. Rodent amygdala begins to support fear-learning at P10, plasticity and long-term potentiation develop in rodent hippocampus in the second postnatal week, and connectivity between human amygdala and hippocampus appears to develop later in children<sup>18,36-38</sup>. Inhibition of noradrenergic cells from P10-21, but not P2-9 or P56-67, increased anxiety- and depression-like behavior in adult mice<sup>39</sup>. Dopamine signaling in the striatum matures rapidly from P10 through adolescence and is required from P18-28, but not from birth or in adulthood, for normal physiological development and related behaviors<sup>40,41</sup>.

While there are mixed reports on whether timing of ELS experience in humans influences later depression<sup>6,42-44</sup>, it is also necessary to consider that mice are born premature relative to humans and for at least some brain systems rodent postnatal week one is more similar to the second half of human gestation<sup>45,46</sup>.

The latent behavioral stress sensitivity induced by ELS is useful for disentangling the enduring transcriptional impact of ELS associated with vulnerability, from neurobiological changes associated with depression-like behaviors *per se* or with acute stress. Across three brain reward-associated regions, we find broadly similar transcriptional changes after ELS and adult stress. These similarities were visualized using both thresholded (heatmap) and threshold-free (RRHO) analyses (**Figure 2**). These findings corroborate and extend our previous findings of depression-like transcriptional patterns after ELS in the adult male VTA<sup>7</sup>. However, RNA-seq also revealed that adult stress after ELS does not simply amplify transcriptional differences observed after either stress alone, but instead results in unique transcriptional changes. Our results show for the first time that experience of stress in adulthood induces distinct transcriptional patterns depending on a history of ELS, across multiple brain regions in both male and female mice. These findings suggest that ELS alters transcriptional development of the brain- or, the lifelong potential (priming) of transcriptional regulation in response to subsequent stressful stimuli.

Given that male and female mice used in this study were generated in separate cohorts (see Methods), experienced different adult stresses (STVS or repeated social defeat), and tissue was processed

separately, we have deliberately avoided direct comparisons of potential sex differences in response to stress as sex and cohort variables cannot be distinguished. RNA-seq in both human and mouse brain reveals substantial sex differences at baseline as well as in human depression and stressed mice<sup>13,47-49</sup>. Nevertheless, it is still useful to consider here similarities in biological pathways affected by each stress or combination of stresses among male and female mice, even when distinct genes contribute to pathway enrichment. Several GO terms related to brain and organism development were enriched in ELS DEG lists across sexes and regions. These predictions suggest that ELS alters brain development across reward regions in both sexes, through distinct genes, but potentially common pathways related to neuronal outgrowth and synapse formation and signaling. Moreover, several regulators predicted in females have been previously implicated in depression-like behavior in male mice. NPAS2 (neuronal PAS-domain protein 2) is a predicted transcriptional regulator after two hits of stress in female NAc (**Figure 4**), and has been previously identified to mediate stress response through regulation of GABAA receptors in male NAc<sup>50</sup>. SNCA and CTNNB1 were both predicted upstream regulators of transcriptional response to ELS in female VTA and NAc (**Figure 3**). SCNA (alpha-synuclein) regulates monoamine neurotransmitters and inhibits BDNF/TrkB signaling<sup>51</sup> (which is altered by early life and adult stress in mesocorticolimbic regions and associated with depression-like behavior<sup>52,53</sup>), and is also dysregulated in serum of depressed patients<sup>54</sup> and hippocampus of rats after stress across the lifespan<sup>55,56</sup>. *Ctnnb1* (which encodes  $\beta$ -catenin) in male NAc D2 receptor subtype neurons was previously shown to mediate resilience to adult stress through DICER-mediated microRNA regulation<sup>57</sup>. DICER1 was also a top predicted upstream regulator in female PFC (**Figure 3h**), suggesting common enduring molecular alterations across brain reward regions in response to stress. However, upregulation of these pathways in NAc was found to increase resilience in males, whereas these pathways are associated with stress susceptibility in females after ELS. These results therefore raise the possibility of prominent sex differences and/or timing stress (developmental vs

adult) in the role played by CTNNB1 in stress responses.

Some similarities in transcriptional regulation between sexes were observed after two hits of stress compared to ELS alone. Most strikingly, steroid hormones and steroid hormone receptors are predicted upstream regulators after a second hit of stress in both males and females (**Figure 4**). Of note, estrogen receptor-alpha (ESR1) is a predicted upstream regulator of transcriptional response to a second hit of stress in male and female NAc, but not to adult stress alone (not shown). Increased frequency of rat maternal care (associated with lower anxiety-like behavior) increases *Esr1* expression and activity in the medial preoptic area of the hypothalamus in female offspring<sup>58-60</sup>. *Esr1* also drives a pro-resilient phenotype in NAc of male and female mice<sup>61</sup>. In contrast to this finding, in the current datasets ESR1 is predicted to be activated in female NAc after a second hit of stress, with no predicted direction in male NAc. It is possible that activation of ESR1 and its downstream gene targets in response to a second hit of stress represents a compensatory mechanism to cope with additional stress, but additional time points are necessary to test this hypothesis.

Our previous work focused on enduring transcriptional changes after ELS that may underlie vulnerability to stress in adulthood, while the current analyses extends to latent transcriptional changes revealed by the second hit of stress, which we call primed genes (**Figure 5; Supplemental Table 3**). Despite cohort differences, a portion of primed genes were common to both male and female NAc. Of the genes similarly primed up in male and female NAc, there was a significant gene ontology enrichment for ion transport ( $p=0.032$ ) which included *Kcnj13* (the voltage-gated inwardly rectifying potassium channel Kir7.1), *Steap1* (six-transmembrane epithelial antigen of prostate 1), and *Slc4a5* (electrogenic sodium bicarbonate cotransporter 4). Several of the primed genes identified by our analyses have been previously implicated in stress vulnerability and depression-like behavior in humans and rodents. *Sgkl* (serum- and glucocorticoid-inducible kinase 1) was primed down in male VTA. While *Sgkl* is increased in blood of depressed patients, it exerts a neuroprotective role under oxidative stress conditions which may be

selectively suppressed in male VTA after ELS<sup>62,63</sup>. *Npy* has also been implicated in stress response (in different directions depending on region and acute vs long-term sampling<sup>64</sup>) and is primed up in male VTA in our dataset and elevated in male and female hypothalamic regions after ELS from P2-9<sup>65</sup>. Only one primed gene, *Myrf* (myelin regulatory factor) in female PFC, has been associated with major depression in human GWAS studies<sup>66</sup>. Empirical testing is needed to determine whether manipulation of primed genes, alone or in combination, is sufficient to alter sensitivity to adult stress.

Lastly, we used these RNA-seq data to test the hypothesis that ELS enriches for established transcriptional signatures of cortical plasticity. In visual cortex, experience-dependent plasticity declines after a juvenile critical period concurrent with an increase in *Lynx1*, which binds nicotinic acetylcholine receptors<sup>16</sup>. *Lynx1* knockout preserves experience-dependent plasticity past the critical period into adulthood<sup>16</sup>. Our hypothesis was supported in male NAc, and to a lesser degree in male VTA and female PFC (**Figure 6**). This suggests that one mechanism for increased sensitivity to future stress is through inappropriately preserved brain plasticity, in a sex- and region-dependent manner. Enriched plasticity signatures were unique to stress experienced in the postnatal period, as adult stress alone either had no impact on plasticity or negatively impacted plasticity. However, after a second hit of stress, plasticity enrichment was reversed in male NAc and PFC, while it was augmented in female PFC. Thus, in males, a second stress exposure may be a trigger to close the extended plasticity period and decrease behavioral flexibility through decreased plasticity, leading to maladaptive behavior. In support of this theory, hippocampal synaptic plasticity in the form of stimulation-induced long-term potentiation (LTP) develops between P9 and P22, and a single day of maternal deprivation increases plasticity in juvenile males, which can then be suppressed by corticosterone in adult males<sup>67</sup>. Stress in adulthood similarly enhances plasticity in VTA and NAc, though the long-term impact of developmental stress on physiological plasticity in VTA and NAc remain to be tested<sup>68-70</sup>. Both ELS and adult stress impair plasticity in male

PFC, consistent with our plasticity signature findings<sup>71-73</sup>.

The two-hit stress paradigm utilized in female and male mice in the present study is useful for studying neurodevelopmental adaptations to ELS associated with later vulnerability to adult stress and the development of depression-related behavioral abnormalities. In particular, these comprehensive RNA-seq datasets provide a foundation for future research to test the causal role of specific molecular pathways implicated in ELS-induced stress sensitivity and priming in both sexes.

## **METHODS:**

### *Animals:*

C57BL/6J mice were maintained on a 12-hour light/dark cycle (lights on at 7AM) with ad libitum access to food and water. All experiments were conducted in accordance with the guidelines of the Institutional Animal Care and Use Committee at Mount Sinai and of the Society for Neuroscience. All behavioral testing occurred during the animals' light cycle. Experimenters were blind to experimental group, and order of testing was counterbalanced during behavioral experiments.

All mating occurred in-house to prevent shipping stress during gestation. Two nulliparous C57BL/6J female mice (Jackson) were mated with one male in our animal facility. Males were removed after five days and females were separated into individual cages 1-3 days prior to parturition. Litters were weighed and counted and cages cleaned on the day of birth (P0) but otherwise undisturbed. Cages were cleaned with minimal disruption to the litter once/week. Offspring were weaned at postnatal day P21 with males and females weaned separately into cages of 3-5 mice, keeping littermates together and only combining pups from different litters and of the same experimental condition to maintain 3 or more mice/cage. Male and female mice included here were from separate cohorts.

### *Stress paradigms:*

ELS was performed as described previously<sup>7</sup>. Briefly, litters were assigned randomly to standard-rearing (Std) or ELS groups. ELS consisted of a combination of maternal separation and limited

nesting<sup>25,74,75</sup> from P10-17 (females; **Figure 1a**) or from P10-20 (males; **Figure 1l**) as described<sup>7</sup>. Pups were separated together as a litter to clean cages with distinct bedding for 3-4 hours/day at random times each day during the light cycle to minimize predictability and habituation. EnviroDri nesting material was depleted to 1/3 of standard-reared cages during the days of separations and then restored on the final day. Early-ELS was identical but from P2-10, and separation cages were placed on warming pads to maintain constant low temperature (32-34°C) since pups at that age cannot thermoregulate on their own.

Adult mice were assigned randomly to control or adult stress conditions, and littermates were assigned to different groups for within-litter controls. Adult stress for male mice consisted of chronic social defeat stress (CSDS), as previously described<sup>7,12</sup>. Adult stress for female mice consisted of three days of sub-threshold variable stress (STVS; **Figure 1a**) as described previously<sup>13</sup> in order to test whether ELS increased vulnerability to stress that would not normally result in depression-like behavior for standard-reared mice. We used STVS in female mice because, at the time of this study, a social defeat procedure had not yet been validated for female C57BL/6J mice. On three consecutive days, female mice experienced: 100 random mild foot shocks at 0.45 mA for 1 hour (10 mice to a chamber), a tail suspension stress for 1 hour, and restraint stress in a 50mL conical tube for 1 hour. Mice were individually housed following the final stressor, and behavioral testing began the next day.

#### *Behavioral testing:*

Behavior of male mice was characterized and reported previously<sup>7</sup>. Female depression-like behaviors were tested in one cohort used for RNA-seq and in an additional replication cohort which included early-ELS exposed mice. Beginning the day after the last day of adult stress, one behavioral test was conducted per day for three consecutive days, in the order described below, with the exception of sucrose preference which spanned behavioral testing days.

*Splash test:* Splash test was performed as described<sup>13,76</sup>. The test was performed under red light (230 V, 15 W). Mice were placed in an empty cage and sprayed on the back with a 10% sucrose solution two

times. Behavior was video recorded for 5 min. The latency to begin grooming the back, and the total amount of time grooming thereafter (back, hands, and face) was scored by hand by an observer blind to experimental group. Increased latency and decreased total grooming time were considered indicators of depression- or anxiety-like behavior<sup>13</sup>.

*Sucrose preference test:* Sucrose preference, a measure of anhedonia-like behavior in mice, was assessed in a two-bottle choice test<sup>77</sup>. Upon single-housing, mice were acclimated overnight with two bottles of drinking water (50 mL conical tubes fitted with spouted rubber tops). The next day after conclusion of the splash test, water in one bottle was replaced with a 1% sucrose solution and both bottles weighed. Bottles were weighed again daily at the beginning of the light cycle for two days. Bottle locations were switched at each measurement to prevent location habituation. Percent sucrose preference was calculated as amount (g) sucrose solution consumed over total amount (g) of water and sucrose consumed.

*Novelty suppressed feeding:* Testing was adapted from previous work<sup>10</sup>. Mice were food restricted overnight before testing. On the day of testing, mice habituated to the testing room for at least 1 hour. Under red light conditions, mice were then placed into a 40×40×20 cm arena with wood-chip bedding covering the floor and a single standard chow food pellet in the center of the arena. Mice were placed in the corner of the box, and the latency to eat was hand-scored for up to 5 min during testing. A video-tracking system (Ethovision, Noldus) measured locomotor activity. At the end of the test, mice were transferred to their home cage in standard lighting conditions, and the latency to eat was recorded by hand. A ratio of latency to eat in the novel arena / home cage was then calculated.

*Forced swim test:* Mice were individually placed in beakers of 25 ±1°C water for 6 min with ambient lighting. Immobility was assessed by a video-tracking system as a measure of depression-like behavior (Ethovision, Noldus).

A “*composite depression score*” was calculated based on all tests of depression- and anxiety-like behavior. For the initial behavioral cohort (**Figure 1j** and Figure S1), the behaviors included

ratio of time to eat in novel versus home cage environments ( $>\text{mean}+1\text{SD}$  scored as depression-like), latency to immobility in the forced swim test ( $<\text{mean}-1\text{SD}$ ), sucrose preference ( $<50\%$ ), and splash test grooming duration ( $<\text{mean}-1\text{SD}$ ). Forced swim was not included in the replication cohort. A percent of tests on which each mouse met depression/anxiety-like criteria was then calculated.

#### *Estrous cycle:*

Vaginal swabs were taken from all female mice starting one day prior to behavioral testing and on the day of euthanasia. 15  $\mu\text{L}$  of sterile PBS was gently pipet in and out of the vagina and smeared on a glass slide. Estrous state was immediately determined with a light microscope by cytology of nucleated, cornified, or leukocytic cells, taking into account the previous day's cytology. Notably, nearly all mice entered diestrus following forced swim testing and remained in diestrus on the day of euthanasia.

#### *Statistical analysis of behavior:*

All animals from a litter experienced the same early life conditions. Siblings were randomly assigned to different adult conditions. Subject number occasionally varied within a group between outcome measures due to improper video recording or leaked sucrose preference bottles. Outliers, defined by values more than two standard deviations from group mean, were excluded, which represented  $<3\%$  of all observations. Prism (version 8, GraphPad) and SPSS (IBM, v25) were used for all graphing and statistical analysis of behavior. Significance thresholds were set at  $p < 0.05$ . Main effects and interactions were analyzed by two-way ANOVA. Two-tailed Student's  $t$  test was used for comparison between individual groups if a main effect or interaction was found.

#### *RNA extraction and RNA-sequencing library preparation from stressed mice:*

Samples from male brain were from mice whose behavior was reported previously<sup>7</sup>. Samples from female brain were from mice whose behavior is reported in the initial cohort here (**Figure 1**).

Adult mice were cervically dislocated directly from the home cage 1 day after the final behavioral test. Brains were removed rapidly, placed into ice-cold

PBS, and sliced into 1 mm-thick coronal sections in a slice matrix. Bilateral punches were made from VTA (16 gauge), NAc (14 gauge), and PFC (12 gauge) and flash-frozen in tubes on dry ice. Total RNA was isolated with TriZol reagent (Invitrogen) and purified with RNeasy Micro Kits (Qiagen). All RNA samples were determined to have A260/280 values  $\geq 1.8$  (Nanodrop); samples for RNA-seq had RIN values  $>9$  (BioAnalyzer, Agilent). 500 ng of purified RNA was used to prepare libraries for sequencing using the Truseq mRNA library prep kit (Illumina RS-122-2001/2). As previously reported, male VTA and NAc samples were pooled 3 animals/sample (pooling based on similar behavioral measures) prior to library preparation, and were sequenced on an Illumina Hi-seq machine with 50-nt single-end reads in the Mount Sinai Genomics Core Facilities<sup>7</sup>. Male and female VTA, NAc, and PFC samples were prepared from individual animals (4-6 independent samples/group), and sequenced with 125-nt single-end reads at Beckman Coulter Genomics (currently Genewiz). Samples were multiplexed to produce  $>30\text{M}$  reads/sample. All RNA-seq files are available through Gene Expression Omnibus (GEO), accession GSE89692.

#### *RNA-seq data analysis:*

*RNA-seq differential expression analysis:* RNA-seq reads were aligned to mouse genome NCBI37 (mm9) using Tophat<sup>278</sup>. The average mapping rate was 93% (**Supplemental Table 1**). Uniquely aligned short reads were counted using HTSeq-counts. Principal component analysis was used to detect outliers for removal, although none were identified. Normalization and differential analysis was performed using DESeq<sup>279</sup>.

All genes included in differential gene expression analysis had a base mean expression  $>2$ . Significance was set at uncorrected  $p < 0.05$  for broad pattern identification (**Figure 2**). A fold-change (FC) threshold was set at  $>30\%$  ( $\log_2$  fold-change, LFC  $>|0.3875|$ ) for each comparison. Differentially expressed genes (DEGs) for each comparison represented in Venn Diagrams (**Figure 2**) are limited to protein-coding genes and are reported in **Supplemental Table 2**. Gene lists for heatmaps included a union of all DEGs from any one comparison with matched LFC

values regardless of significance in the other comparisons. Heatmaps were generated using *Morpheus* (*Morpheus*, <https://software.broadinstitute.org/morpheus>) and clustered by one minus Pearson correlation and average linkage. Cell-type enrichment analysis used curated gene lists in which a gene was considered a cell-type specific marker if average expression met the stringent criteria of >10x the average background expression levels of the remaining cell types in that region<sup>15</sup>. Enrichment of DEGs with these cell-type marker lists was determined as an odds ratio of list overlap using the GeneOverlap tool in R<sup>80</sup>. Functional annotation for gene ontology of biological processes was performed using DAVID Bioinformatics Resource 6.7, with  $\geq 5$  genes and  $\text{ease}=0.05$ , reporting only non-redundant categories<sup>81,82</sup>. Upstream regulator predictions were made using the May 2018 release of Ingenuity Pathway Analysis (IPA, Qiagen). Predicted upstream regulators included top predicted genes, cytokines, or endogenous chemicals, made from  $\geq 3$  up- or down-regulated DEGs. HOMER Motif Analysis was used to predict differential transcriptional regulators including transcription factor binding sites and transcriptional elements from enriched 8-10 base sequences located within -2000 to +1000 bases of the TSS of DEGs<sup>83</sup>.

Primed genes (**Supplemental Table 3**) were defined as genes in the ELS+adult stress group that were significantly ( $p<0.05$ ) different from standard-control expression levels with  $\text{LFC} > |0.3875|$ , and also significantly ( $p<0.05$ ) different from both ELS-alone and adult stress-alone groups, in either direction without fold-change cutoff (**Figure 5a**). Overlap among the six lists were plotted using the webtool InteractiVenn.net<sup>84</sup>. LFC expression differences were plotted with Plotly<sup>85</sup> in R with color density indicating significance level and bubble size representing base expression level ( $\log_{10}$  mean counts per million).

*Rank-rank hypergeometric overlap (RRHO)*: Full threshold-free differential expression lists were ranked by the  $-\log_{10}(\text{p-value})$  multiplied by the sign of the fold change from the DESeq2 analysis, filtered to all genes with a mean base expression of greater than 2 RPKM to avoid low-expression artifacts. RRHO was used to evaluate the overlap of differential expression lists between stress comparisons<sup>86-88</sup>. A two-sided version of this analysis was used to test for

coincident and opposite enrichment<sup>14</sup>. RRHO difference maps were produced for pairs of RRHO maps (ELS-Control vs. Standard-Control compared to adult stress-Control vs. Standard-Control, and adult stress-Control vs. Standard-Control compared to ELS+adult stress vs. ELS-Control) by calculating for each pixel the normal approximation of difference in log odds ratio and standard error of overlap between each matched comparison. This Z score was then converted to a P-value and corrected for multiple comparisons across pixels.

Male and female tissue sequenced in this study were from separate cohorts, making a direct comparison of male vs female samples invalid as we cannot separate sex effects from cohort effects. Having said that, we observed 3-15% overlap of DEG's between males and females in each of the three brain regions studied for each comparison, which is consistent with very small overlap seen between depressed human males and females as well as between male and female mice subjected to the same stress procedure and analyzed within the same cohort<sup>13,47,48</sup>.

#### *RNA-seq plasticity signature analysis:*

*Lynx1*<sup>-/-</sup> plasticity signatures were generated from publicly available RNA-seq data derived from adult (>P60) primary visual cortex tissue punch of male *Lynx1*<sup>-/-</sup> vs WT mice (GEO: GSE89757, 17). Briefly, we used Limma<sup>89</sup> to quantile normalized raw microarray probe-level data and RankProd<sup>90</sup> to compute rank-based differential expression of mouse genes retaining genes with a False Discovery Rate < 0.05<sup>91</sup>, which we mapped to Entrez IDs to yield a 114 gene *Lynx1*<sup>-/-</sup> transcriptional signature.

Genes differentially expressed across the entire transcriptome of early life and adult stress signatures were converted to Entrez IDs and unmapped and unexpressed genes were removed. A molecular matching score was calculated between the plasticity signature and a given stress signature by summing the logFC expression values in a stress signature that are shared with genes decreased in the plasticity signature and subtracting them from the sum of logFC expression values shared with genes increased in the plasticity signature to yield a summary measure of concordance between stress and plasticity signatures.

High molecular match scores (>0) indicate a given stress signature mimics the plasticity signature whereas low molecular match scores (<0) indicate a given stress signature induces gene expression that opposes the plasticity signature.

To estimate the  $P$  value of molecular match scores ( $M$ ) between a given stress and plasticity signature, we calculated an empirical  $P$  value for  $M$  given  $n = 10,000$  permutations of  $M$  ( $M_{perm}$ ), computed by shuffling the gene labels of the stress signature and recalculating  $M$ . The Generalized Pareto Distribution<sup>92</sup> was used to improve accuracy of the  $P$  value estimation and multiple hypothesis tests were adjusted for using the False Discovery Rate<sup>91</sup>. To compare  $M$  for a given plasticity signature across the stress signatures, we normalized  $M$  with  $M_{perm}$

according to 
$$\frac{M - \bar{M}_{perm}}{\sqrt{\frac{\sum_{i=1}^n (M_{perm_i} - \bar{M}_{perm})^2}{n-1}}}$$
 to yield a normalized score  $M$  (the effect size).  $M$  is computed similar to the approach by Zhang and Gant<sup>93</sup>. Analyses were completed in the R programming language (v 3.2.2).

## ACKNOWLEDGEMENTS

We would like to thank Daniel A. Porada, Gabriella Fricklas, and Delaney Dalldorf for their work scoring behavior. This work was supported by funding from the National Institutes of Health (K99 MH115096 to CJP; P50 MH096890 and R01 MH051399 to EJM) and the Hope for Depression Research Foundation.

## AUTHOR CONTRIBUTIONS

CJP and EJM designed the studies. CJP, MS, RCB, HGK, HMC, and BP performed the experiments. CJP, MS, AR, and IM performed the data analysis with input from LS, HM, and JD. CJP, MS, and EJM took part in interpretation of the results. CJP wrote the manuscript. All authors approved the manuscript.

## COMPETING INTERESTS

There are no conflicts of interest to report.

## REFERENCES

1. Scott, K. M., McLaughlin, K. A., Smith, D. A. R. & Ellis, P. M. Childhood maltreatment and DSM-IV adult mental disorders: comparison of prospective and retrospective findings. *Br J Psychiatry* **200**, 469–475 (2012). PMID: 22661679

2. Norman, R. E. *et al.* The Long-Term Health Consequences of Child Physical Abuse, Emotional Abuse, and Neglect: A Systematic Review and Meta-Analysis. *PLOS Med* **9**, e1001349 (2012).
3. U.S. Department of Health & Human Services, Administration for Children and Families, Administration on Children, Youth and Families, Children's Bureau. *Child Maltreatment 2017*. Available from <https://www.acf.hhs.gov/sites/default/files/cb/cm2017.pdf>. (2019).
4. McGuigan, W. M. & Middlemiss, W. Sexual abuse in childhood and interpersonal violence in adulthood: a cumulative impact on depressive symptoms in women. *J Interpers Violence* **20**, 1271–1287 (2005). PMID: 16162489
5. Zhang, Z.-Y. *et al.* Early adversity contributes to chronic stress induced depression-like behavior in adolescent male rhesus monkeys. *Behavioural Brain Research* **306**, 154–159 (2016). PMID: 27025444
6. Farrell, A. K., Simpson, J. A., Carlson, E. A., Englund, M. M. & Sung, S. The Impact of Stress at Different Life Stages on Physical Health and the Buffering Effects of Maternal Sensitivity. *Health Psychol* (2016). PMID: 27669179
7. Peña, C. J. *et al.* Early life stress confers lifelong stress susceptibility in mice via ventral tegmental area OTX2. *Science* **356**, 1185–1188 (2017). PMID: PMC5539403
8. Peña, C. J., Nestler, E. J. & Bagot, R. C. Environmental Programming of Susceptibility and Resilience to Stress in Adulthood in Male Mice. *Front. Behav. Neurosci.* **13**, 272 (2019). PMID: 30881296
9. Young, E. S. *et al.* The Dual Impact of Early and Concurrent Life Stress on Adults' Diurnal Cortisol Patterns: A Prospective Study. *Psychological Science* **1**, 095679761983366 (2019).
10. Bodnoff, S. R., Suranyi-Cadotte, B., Quirion, R. & Meaney, M. J. A comparison of the effects of diazepam versus several typical and atypical anti-depressant drugs in an animal model of anxiety. *Psychopharmacology* **97**, 277–279 (1989). PMID: 2567028
11. Porsolt, R. D., Le Pichon, M. & Jalfre, M. Depression: a new animal model sensitive to antidepressant treatments. *Nature* **266**, 730–732 (1977). PMID: 559941
12. Berton, O. *et al.* Essential role of BDNF in the mesolimbic dopamine pathway in social defeat stress. *Science* **311**, 864–868 (2006). PMID: 16469931
13. Hodes, G. E. *et al.* Sex Differences in Nucleus Accumbens Transcriptome Profiles Associated with Susceptibility versus Resilience to Subchronic Variable Stress. *Journal of Neuroscience* **35**, 16362–16376 (2015). PMID: PMC4679819
14. Cahill, K. M., Huo, Z., Tseng, G. C., Logan, R. W. & Seney, M. L. Improved identification of concordant and discordant gene expression signatures using an updated rank-rank hypergeometric overlap approach. *Sci Rep* **8**, 9588 (2018). PMID: PMC6018631
15. Mancarci, B. O. *et al.* Cross-Laboratory Analysis of Brain Cell Type Transcriptomes with Applications to Interpretation of Bulk Tissue Data. *eNeuro* **4**, ENEURO.0212–17.2017 (2017).
16. Morishita, H., Miwa, J. M., Heintz, N. & Hensch, T. K. Lynx1, a cholinergic brake, limits plasticity in adult visual cortex. *Science* **330**, 1238–1240 (2010). PMID: PMC3387538
17. Smith, M. R. *et al.* Integrative Analysis of Disease Signatures Shows Inflammation Disrupts Juvenile Experience-

- Dependent Cortical Plasticity. *eNeuro* **3**, ENEURO.0240–16.2016 (2016). PMID: PMC5241709
18. Gee DG, Gabard-Durnam LJ, Flannery J, Goff B, Humphreys KL, Telzer EH, Hare TA, Bookheimer SY, Tottenham N. Early developmental emergence of human amygdala–prefrontal connectivity after maternal deprivation. *Proc Natl Acad Sci USA* **110**, 15638–15643 (2013). PMID: PMC3785723
  19. Goff B, Gee DG, Telzer EH, Humphreys KL, Gabard-Durnam L, Flannery J, Tottenham N. Reduced nucleus accumbens reactivity and adolescent depression following early-life stress. *Neuroscience* **249**, 129–138 (2013).
  20. Hanson, J. L. *et al.* Cumulative stress in childhood is associated with blunted reward-related brain activity in adulthood. *Soc Cogn Affect Neurosci* (2015). PMID: PMC4769626
  21. Stuart, S. A., Hinchcliffe, J. K. & Robinson, E. S. J. Evidence that neuropsychological deficits following early life adversity may underlie vulnerability to depression. *Neuropsychopharmacology* **3**, e442 (2019).
  22. Yu, M. *et al.* Childhood trauma history is linked to abnormal brain connectivity in major depression. *Proc Natl Acad Sci USA* **122**, 201900801 (2019). PMID: 30962366
  23. Anacker C, Scholz J, O'Donnell KJ, Allemang-Grand R, Diorio J, Bagot RC, Nestler EJ, Hen R, Lerch JP, Meaney MJ. Neuroanatomic Differences Associated With Stress Susceptibility and Resilience. *BPS* **79**, 840–849 (2016). PMID: 26422005
  24. Plotsky, P. M. & Meaney, M. J. Early, postnatal experience alters hypothalamic corticotropin-releasing factor (CRF) mRNA, median eminence CRF content and stress-induced release in adult rats. *Molecular Brain Research* **18**, 195–200 (1993). PMID: 8497182
  25. Rice, C. J., Sandman, C. A., Lenjavi, M. R. & Baram, T. Z. A novel mouse model for acute and long-lasting consequences of early life stress. *Endocrinology* **149**, 4892–4900 (2008). PMID: PMC2582918
  26. Opendak, M. & Sullivan, R. M. Unique infant neurobiology produces distinctive trauma processing. *Dev Cogn Neurosci* **36**, 100637 (2019). PMID: 30889546
  27. Goodwill HL, Manzano-Nieves G, Gallo M, Lee H-I, Oyerinde E, Serre T, Bath KG. Early life stress leads to sex differences in development of depressive-like outcomes in a mouse model. *Neuropsychopharmacology* **44**, 711–720 (2019).
  28. Hsiao, Y.-M. *et al.* Early life stress dampens stress responsiveness in adolescence: Evaluation of neuroendocrine reactivity and coping behavior. *Psychoneuroendocrinology* **67**, 86–99 (2016).
  29. Santarelli, S. *et al.* An adverse early life environment can enhance stress resilience in adulthood. *Psychoneuroendocrinology* **78**, 213–221 (2017).
  30. Bernet, C. Z. & Stein, M. B. Relationship of childhood maltreatment to the onset and course of major depression in adulthood. *Depress Anxiety* **9**, 169–174 (1999). PMID: 10431682
  31. Hammen, C., Henry, R. & Daley, S. E. Depression and sensitization to stressors among young women as a function of childhood adversity. *J Consult Clin Psychol* **68**, 782 (2000).
  32. Teicher, M. H., Samson, J. A., Polcari, A. & Andersen, S. L. Length of time between onset of childhood sexual abuse and emergence of depression in a young adult sample: a retrospective clinical report. *J Clin Psychiatry* **70**, 684–691 (2009). PMID: PMC4266432
  33. Mutlu, A. K. *et al.* Sex differences in thickness, and folding developments throughout the cortex. *Neuroimage* **82**, 200–207 (2013).
  34. Holland, F. H., Ganguly, P., Potter, D. N., Chartoff, E. H. & Brenhouse, H. C. Early life stress disrupts social behavior and prefrontal cortex parvalbumin interneurons at an earlier time-point in females than in males. *Neuroscience Letters* **566**, 131–136 (2014). PMID: PMC4476267
  35. Suri, D., Teixeira, C. M., Cagliostro, M. K. C., Mahadevia, D. & Ansorge, M. S. Monoamine-Sensitive Developmental Periods Impacting Adult Emotional and Cognitive Behaviors. *Neuropsychopharmacology* **40**, 88–112 (2015).
  36. Bekenstein, J. W. & Lothman, E. W. An in vivo study of the ontogeny of long-term potentiation (LTP) in the CA1 region and in the dentate gyrus of the rat hippocampal formation. *Brain Res Dev Brain Res* **63**, 245–251 (1991).
  37. Sullivan, R. M., Landers, M., Yeaman, B. & Wilson, D. A. Good memories of bad events in infancy. *Nature* **407**, 38–39 (2000).
  38. Gee DG, Humphreys KL, Flannery J, Goff B, Telzer EH, Shapiro M, Hare TA, Bookheimer SY, Tottenham N. A developmental shift from positive to negative connectivity in human amygdala–prefrontal circuitry. *Journal of Neuroscience* **33**, 4584–4593 (2013). PMID: PMC3670947
  39. Meng, Q., Garcia-Garcia, A. L., Dranovsky, A. & Leonardo, E. D. Inhibition of norepinephrine signaling during a sensitive period disrupts locus coeruleus circuitry and emotional behaviors in adulthood. *bioRxiv* 287243 (2018). doi:10.1101/287243
  40. Yu, Q. *et al.* Dopamine and serotonin signaling during two sensitive developmental periods differentially impact adult aggressive and affective behaviors in mice. *Mol Psychiatry* **19**, 688–698 (2014).
  41. Lieberman, O. J. *et al.* Dopamine Triggers the Maturation of Striatal Spiny Projection Neuron Excitability during a Critical Period. *Neuron* (2018). doi:10.1016/j.neuron.2018.06.044
  42. Schalinski, I. *et al.* Type and timing of adverse childhood experiences differentially affect severity of PTSD, dissociative and depressive symptoms in adult inpatients. *BMC Psychiatry* **16**, 295 (2016). PMID: PMC4992284
  43. Björkenstam, E., Pebley, A. R., Burström, B. & Kosidou, K. Childhood social adversity and risk of depressive symptoms in adolescence in a US national sample. *J Affect Disord* **212**, 56–63 (2017).
  44. Dunn, E. C., Nishimi, K., Gomez, S. H., Powers, A. & Bradley, B. Developmental timing of trauma exposure and emotion dysregulation in adulthood: Are there sensitive periods when trauma is most harmful? *J Affect Disord* **227**, 869–877 (2018).
  45. Semple, B. D., Blomgren, K., Gimlin, K., Ferriero, D. M. & Noble-Haesslein, L. J. Brain development in rodents and humans: Identifying benchmarks of maturation and vulnerability to injury across species. *Progress in Neurobiology* **106-107**, 1–16 (2013). PMID: PMC3737272
  46. Ohmura, Y. & Kuniyoshi, Y. A translational model to determine rodent's age from human foetal age. *Sci Rep* **7**, 17248 (2017).
  47. Labonté B, Engmann O, Purushothaman I, Menard C, Wang J, Tan C, Scarpa JR, Moy G, Loh Y-HE, Cahill M, Lorsch ZS, Hamilton PJ, Calipari ES, Hodes GE, Issler O, Kronman H, Pfau M, Obradovic ALJ, Dong Y, Neve RL, Russo S,



- Kazarskis A, Tamminga C, Mechawar N, Turecki G, Zhang B, Shen L, Nestler EJ. Sex-specific transcriptional signatures in human depression. *Nat Med* (2017). doi:10.1038/nm.4386 PMID: PMC5734943
48. Seney ML, Huo Z, Cahill K, French L, Puralewski R, Zhang J, Logan RW, Tseng G, Lewis DA, Sibille E. Opposite Molecular Signatures of Depression in Men and Women. *Biological Psychiatry* (2018). doi:10.1016/j.biopsych.2018.01.017 PMID: 29548746
49. Marrocco J, Petty GH, Rios MB, Gray JD, Kogan JF, Waters EM, Schmidt EF, Lee FS, McEwen BS. A sexually dimorphic pre-stressed translational signature in CA3 pyramidal neurons of BDNF Val66Met mice. *Nat Commun* **8**, 24 (2017).
50. Ozburn AR, Kern J, Parekh PK, Logan RW, Liu Z, Falcon E, Becker-Krail D, Purohit K, Edgar NM, Huang Y, McClung CA. NPAS2 Regulation of Anxiety-Like Behavior and GABAA Receptors. *Front Mol Neurosci* **10**, 342 (2017).
51. Kang, S. S. *et al.* TrkB neurotrophic activities are blocked by  $\alpha$ -synuclein, triggering dopaminergic cell death in Parkinson's disease. *Proc Natl Acad Sci USA* **114**, 10773–10778 (2017). PMID: PMC5635931
52. Roth, T. L., Lubin, F. D., Funk, A. J. & Sweatt, J. D. Lasting Epigenetic Influence of Early-Life Adversity on the BDNF Gene. *BPS* **65**, 10–10 (2009). PMID: PMC3056389
53. Bath, K. G., Schilit, A. & Lee, F. S. Stress effects on BDNF expression: Effects of age, sex, and form of stress. *Neuroscience* **239**, 149–156 (2013).
54. Ishiguro, M. *et al.* Increased Serum Levels of  $\alpha$ -Synuclein in Patients With Major Depressive Disorder. *The American Journal of Geriatric Psychiatry* **27**, 280–286 (2019).
55. Henningsen, K. *et al.* Candidate Hippocampal Biomarkers of Susceptibility and Resilience to Stress in a Rat Model of Depression. *Molecular & Cellular Proteomics* **11**, M111.016428 (2012). PMID: PMC3394954
56. Cao, Y. J., Wang, Q., Zheng, X. X., Cheng, Y. & Zhang, Y. Involvement of SNARE complex in the hippocampus and prefrontal cortex of offspring with depression induced by prenatal stress. *J Affect Disord* **235**, 374–383 (2018).
57. Dias, C. *et al.*  $\beta$ -catenin mediates stress resilience through Dicer1/microRNA regulation. *Nature* (2014). doi:10.1038/nature13976 PMID: PMC4257892
58. Francis, D., Diorio, J., Liu, D. & Meaney, M. Nongenomic Transmission Across Generations of Maternal Behavior and Stress Responses in the Rat. *Science* **286**, 1155–1158 (1999).
59. Champagne, F., Diorio, J., Sharma, S. & Meaney, M. J. Naturally occurring variations in maternal behavior in the rat are associated with differences in estrogen-inducible central oxytocin receptors. *Proc Natl Acad Sci USA* **98**, 12736–12741 (2001). PMID: 11606726
60. Peña, C. J., Neugut, Y. D. & Champagne, F. A. Developmental Timing of the Effects of Maternal Care on Gene Expression and Epigenetic Regulation of Hormone Receptor Levels in Female Rats. *Endocrinology* **154**, 4340–4351 (2013). PMID: PMC3800762
61. Lorsch, Z. S. *et al.* Estrogen receptor  $\alpha$  drives pro-resilient transcription in mouse models of depression. *Nat Commun* **9**, 1116 (2018).
62. Schoenebeck, B. *et al.* Sgk1, a cell survival response in neurodegenerative diseases. *Molecular and Cellular Neuroscience* **30**, 249–264 (2005).
63. Anacker, C. *et al.* Role for the kinase SGK1 in stress, depression, and glucocorticoid effects on hippocampal neurogenesis. *Proc Natl Acad Sci USA* **110**, 8708–8713 (2013). PMID: PMC3666742
64. Reichmann, F. & Holzer, P. Neuropeptide Y: A stressful review. *Neuropeptides* **55**, 99–109 (2016).
65. Yam, K. Y. *et al.* Ghrelin and hypothalamic NPY/AgRP expression in mice are affected by chronic early-life stress exposure in a sex-specific manner. *Psychoneuroendocrinology* **86**, 73–77 (2017).
66. Howard, D. M. *et al.* Genome-wide meta-analysis of depression identifies 102 independent variants and highlights the importance of the prefrontal brain regions. *Nat Neurosci* **62**, 1 (2019).
67. Derks, N. A. V., Krugers, H. J., Hoogenraad, C. C., Joëls, M. & Sarabdjitsingh, R. A. Effects of Early Life Stress on Synaptic Plasticity in the Developing Hippocampus of Male and Female Rats. *PLoS ONE* **11**, e0164551 (2016).
68. Campioni, M. R., Xu, M. & McGehee, D. S. Stress-Induced Changes in Nucleus Accumbens Glutamate Synaptic Plasticity. *J Neurophysiol* **101**, 3192–3198 (2009).
69. Stelly, C. E., Pomrenze, M. B., Cook, J. B. & Morikawa, H. Repeated social defeat stress enhances glutamatergic synaptic plasticity in the VTA and cocaine place conditioning. *Elife* **5**, 387 (2016).
70. Pignatelli, M. *et al.* Synaptic Plasticity onto Dopamine Neurons Shapes Fear Learning. *Neuron* **93**, 425–440 (2017).
71. Liston, C. *et al.* Stress-Induced Alterations in Prefrontal Cortical Dendritic Morphology Predict Selective Impairments in Perceptual Attentional Set-Shifting. *J Neurosci* **26**, 7870–7874 (2006). PMID: 16870732
72. Lee, Y. A., Poirier, P., Otani, S. & Goto, Y. Dorsal-ventral distinction of chronic stress-induced electrophysiological alterations in the rat medial prefrontal cortex. *Neuroscience* **183**, 108–120 (2011).
73. Majcher-Maślanka, I., Solarz, A., Wędzony, K. & Chocyk, A. Previous Early-life Stress Modifies Acute Corticosterone-induced Synaptic Plasticity in the Medial Prefrontal Cortex of Adolescent Rats. *Neuroscience* **379**, 316–333 (2018).
74. Gilles, E. E., Schultz, L. & Baram, T. Z. Abnormal corticosterone regulation in an immature rat model of continuous chronic stress. *Pediatr. Neurol.* **15**, 114–119 (1996). PMID: PMC3415889
75. Molet, J., Maras, P. M., Avishai-Eliner, S. & Baram, T. Z. Naturalistic rodent models of chronic early-life stress. *Dev. Psychobiol.* **56**, 1675–1688 (2014).
76. Isingrini, E. *et al.* Resilience to chronic stress is mediated by noradrenergic regulation of dopamine neurons. *Nat Neurosci* (2016). doi:10.1038/nn.4245 PMID: 26878672
77. Krishnan, V. *et al.* Molecular Adaptations Underlying Susceptibility and Resistance to Social Defeat in Brain Reward Regions. *Cell* **131**, 391–404 (2007). PMID: 17956738
78. Trapnell, C., Pachter, L. & Salzberg, S. L. TopHat: discovering splice junctions with RNA-Seq. **25**, 1105–1111 (2009).
79. Love, M. I., Huber, W. & Anders, S. Moderated estimation of fold change and dispersion for RNA-seq data with DESeq2. *Genome Biol* **15**, 550 (2014).
80. Shen, L. & Sinai, M. *GeneOverlap: Test and Visualize Gene Overlaps*. R Package Version 1.18.0, <http://shenlab-sinai.github.io/shenlab-sinai/>. **R** (2018).
81. Da Wei Huang, Sherman, B. T. & Lempicki, R. A. Bioinformatics enrichment tools: paths toward the comprehensive functional analysis of large gene lists. *Nucleic Acids Res* **37**, 1–13 (2009).

82. Huang, D. W., Sherman, B. T. & Lempicki, R. A. Systematic and integrative analysis of large gene lists using DAVID bioinformatics resources. *Nat Protoc* **4**, 44–57 (2009). PMID: 19131956
83. Heinz, S. *et al.* Simple combinations of lineage-determining transcription factors prime cis-regulatory elements required for macrophage and B cell identities. *Molecular Cell* **38**, 576–589 (2010). PMCID: PMC2898526
84. Heberle, H., Meirelles, G. V., da Silva, F. R., Telles, G. P. & Minghim, R. InteractiVenn: a web-based tool for the analysis of sets through Venn diagrams. *BMC Bioinformatics* *2008 9:1* **16**, 213 (2015).
85. Plotly Technologies Inc. Collaborative data science. Montréal, QC, 2015. <https://plot.ly>.
86. Plaisier, S. B., Taschereau, R., Wong, J. A. & Graeber, T. G. Rank-rank hypergeometric overlap: identification of statistically significant overlap between gene-expression signatures. *Nucleic Acids Res* **38**, e169–e169 (2010).
87. Stein, J. L. *et al.* A quantitative framework to evaluate modeling of cortical development by neural stem cells. *Neuron* **83**, 69–86 (2014). PMCID: PMC4277209
88. Bagot, R. C. *et al.* Circuit-wide Transcriptional Profiling Reveals Brain Region-Specific Gene Networks Regulating Depression Susceptibility. *Neuron* **90**, 969–983 (2016). PMCID: PMC4896746
89. Smyth, G. K. in *Bioinformatics and Computational Biology Solutions Using R and Bioconductor* 397–420 (Springer-Verlag, 2005). doi:10.1007/0-387-29362-0\_23
90. Breitling, R., Armengaud, P., Amtmann, A. & Herzyk, P. Rank products: a simple, yet powerful, new method to detect differentially regulated genes in replicated microarray experiments. *FEBS Lett* **573**, 83–92 (2004).
91. Benjamini, Y. & Hochberg, Y. Controlling the false discovery rate: a practical and powerful approach to multiple testing. *Journal of the Royal Statistical Society. Series B Methodological* **57**, 289–300 (1995).
92. Knijnenburg, T. A., Wessels, L. F. A., Reinders, M. J. T. & Shmulevich, I. Fewer permutations, more accurate P-values. *Bioinformatics* **25**, i161–i168 (2009).
93. Zhang, S.-D. & Gant, T. W. A simple and robust method for connecting small-molecule drugs using gene-expression signatures. *BMC Bioinformatics* *2008 9:1* **9**, 258 (2008).

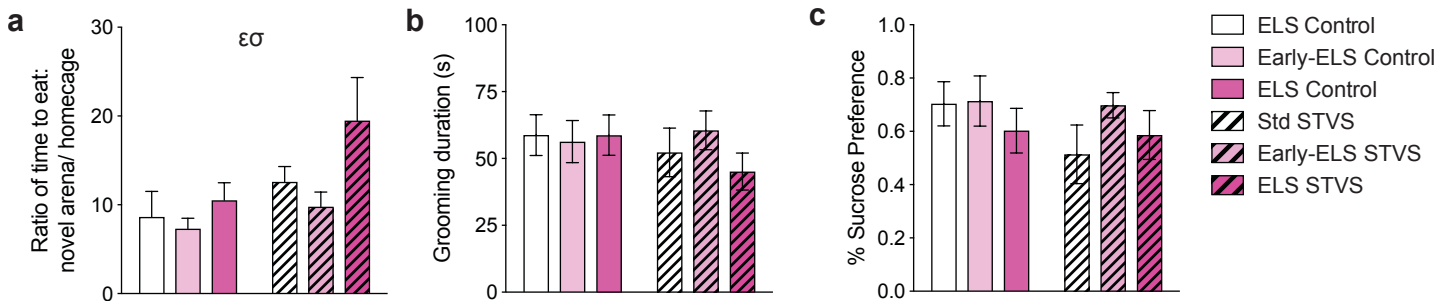

**Supplemental Figure S1 | Early-ELS does not significantly alter depression-like behavior before or after STVS. a,** Ratio of latency to eat in a novel arena vs home cage in the novelty suppressed feeding test in a behavioral replication cohort of adult female mice. **b,** Grooming duration in the splash test. **c,** Sucrose preference in a two-bottle choice test. Significant ( $p < 0.05$ ) main effect of ELS ( $\epsilon$ ) or of adult stress ( $\sigma$ ) as indicated. Error bars indicate mean  $\pm$  SEM.

### Additional supplemental files:

**Supplemental Table 1** | RNA-seq mapping rate

**Supplemental Table 2** | Differentially expressed genes at  $>30\%$  fold-change and  $p < 0.05$

**Supplemental Table 3** | Primed genes
